# Supplementary material for: Tissue Usage Preference and Intrinsically Disordered Region Remodeling of Alternative Splicing Derived Proteoforms in the Heart
Source: PubMed Central journal article supplement — bioRxiv. 2023 Oct 9:2023.10.08.561375. Preprint. [Version 1] doi: 10.1101/2023.10.08.561375 (PMC10592692; doi:10.1101/2023.10.08.561375), 2023-10-09
Supplement: NIHPP2023.10.08.561375v1-supplement-6.pdf [file NIHPP2023.10.08.561375v1-supplement-6.pdf]

## Supplemental Tables and Figures

**Supplemental Table S1:** limma results from canonical database search using MSFragger/Philosopher in PXD008722

**Supplemental Table S2:** limma results from JCAST canonical + isoform database search using MSFragger/Philosopher in PXD008722

**Supplemental Table S3:** limma results for alternative isoforms quantified in validation data

**Supplemental Table S4:** All identified isoforms by Comet/Percolator and MSFragger/Philosopher

**Supplemental Table S5:** Annotated protein features in identified isoforms.

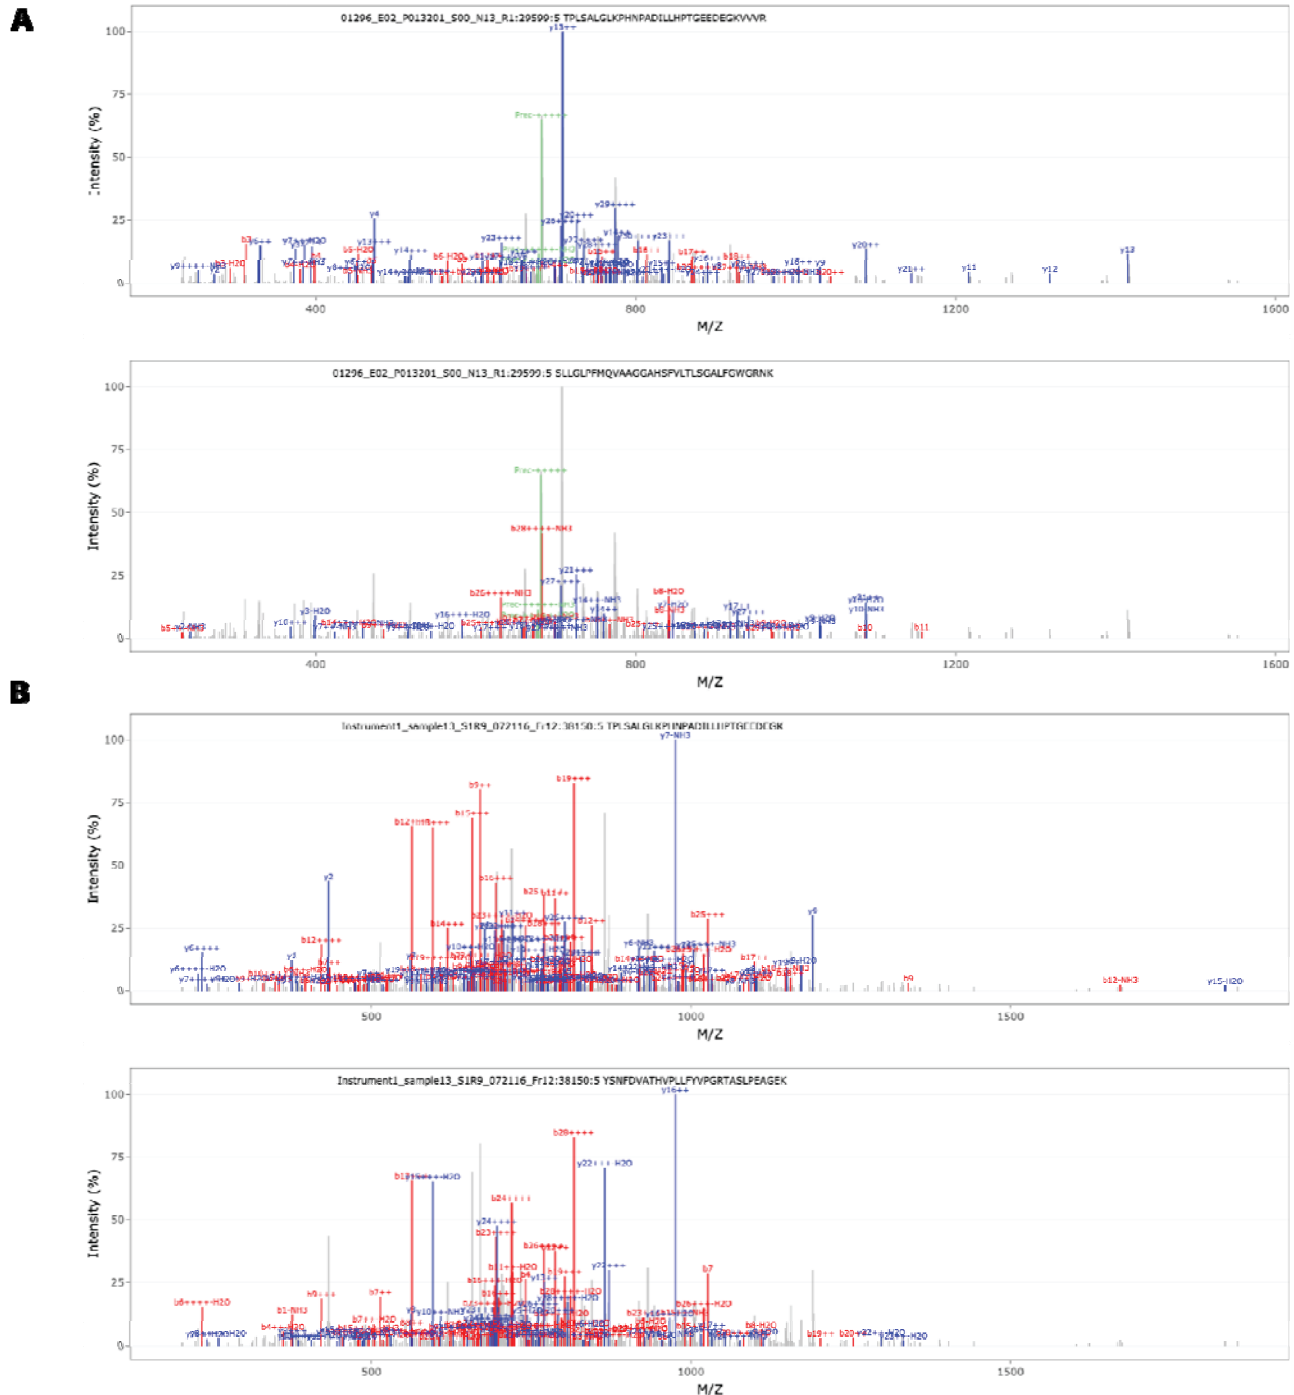

**Supplemental Figure S1:** PepQuery2 peptide-spectrum matches for two undocumented tensin-1 -J1 isoform peptides. **A.** Peptide spectrum match of the splice junction peptide

TPLSALGLKPHNPADILLHPTGEEDEGKVVVR against the “29\_healthy\_human\_tissues” (PXD010154) dataset (hyperscore 83.29) (top) and the corresponding peptide spectrum match from the canonical database search (bottom). **B.** Peptide spectrum match of the splice junction peptide TPLSALGLKPHNPADILLHPTGEEDEGK against the “GTEx\_32\_Tissues\_Proteome” (PXD016999) dataset (hyperscore 99.63) (top) and the corresponding peptide spectrum match from the canonical database search (bottom).

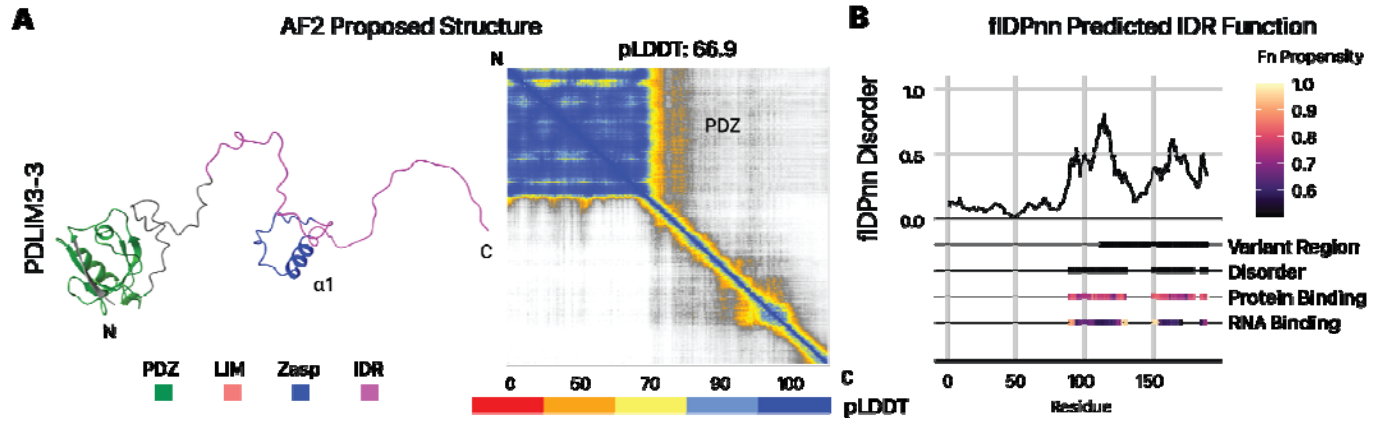

**Supplemental Figure S2: A.** AlphaFold2 proposed structure and **B.** fIDPnn predicted sequence disorders and functional features for the PDLIM3-3 isoform. See legends for Figure 2 for additional details.

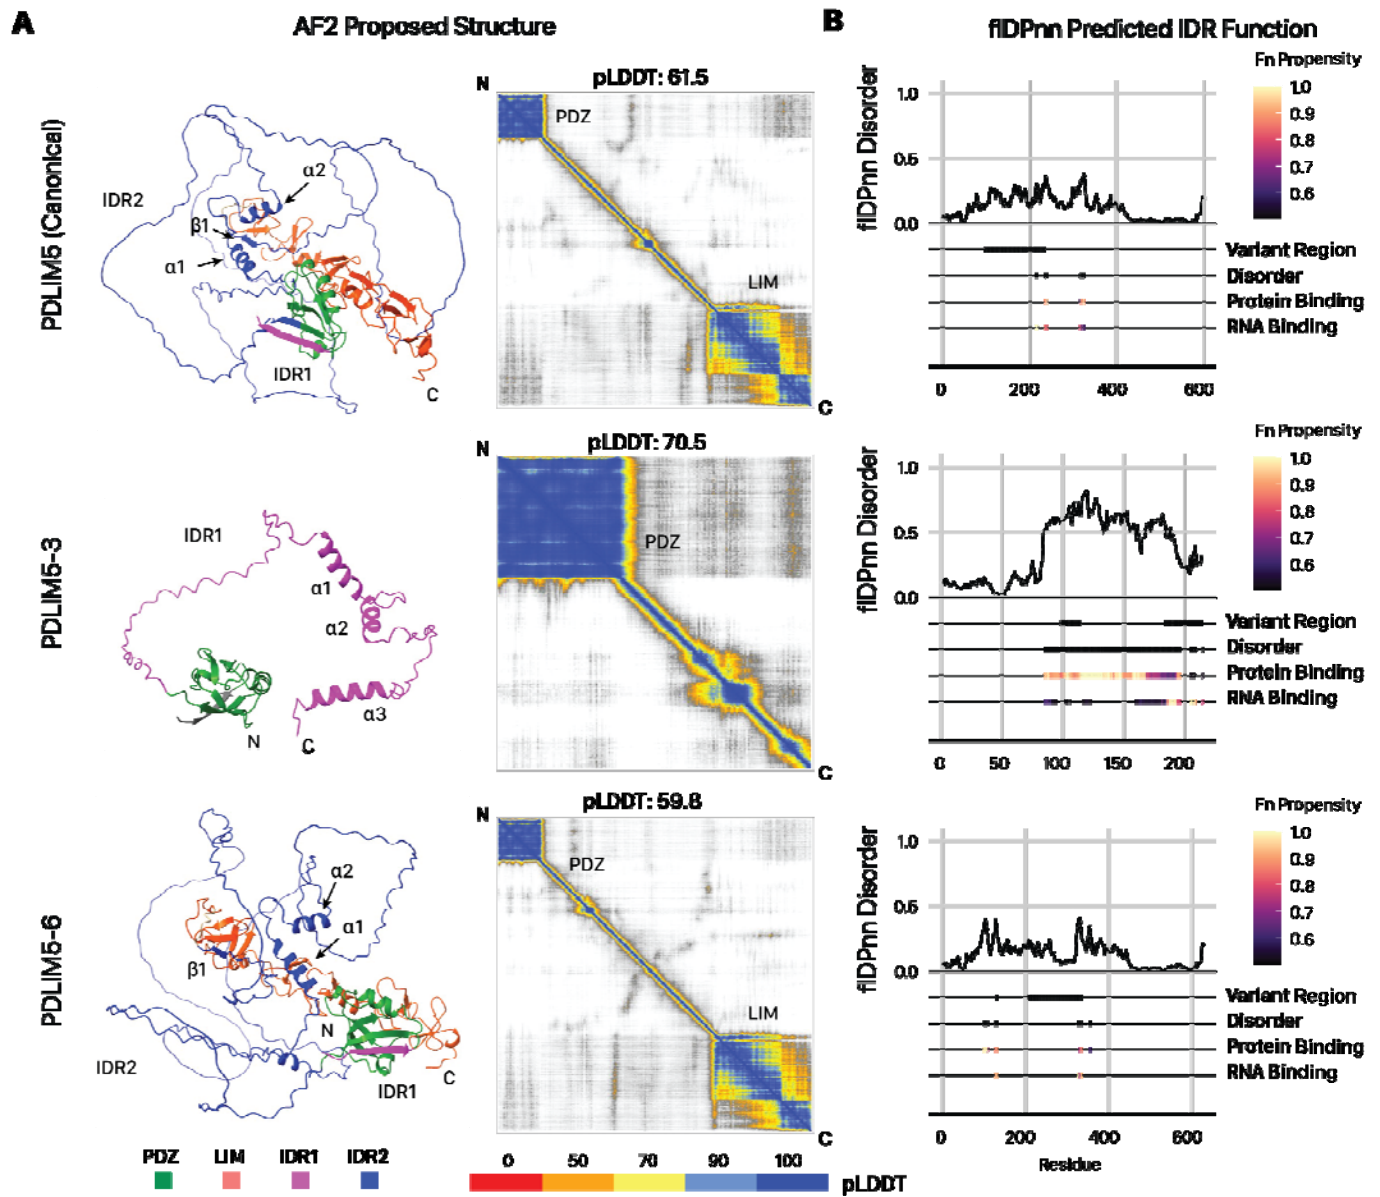

**Supplemental Figure S3: A.** AlphaFold2 proposed structure and **B.** fIDPnn predicted sequence disorders and functional features for the PDLIM5 sequence and the -3 and -6 alternative isoforms. See legends for Figure 2 for additional details.

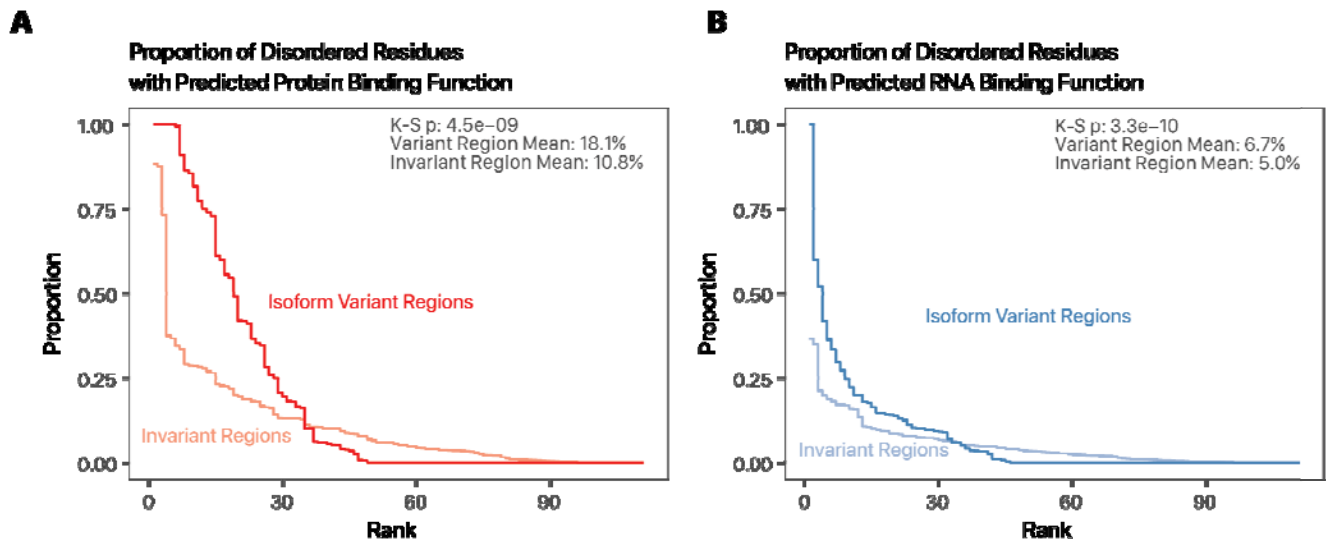

**Supplemental Figure S4:** Proportion of residues within fIDPnn predicted IDRs that are associated with **A.** protein binding or **B.** RNA binding function. K-S: two-sample Kolmogorov-Smirnov test. Darker line: IDR residues within isoform variant regions; lighter line: outside the isoform variant regions.

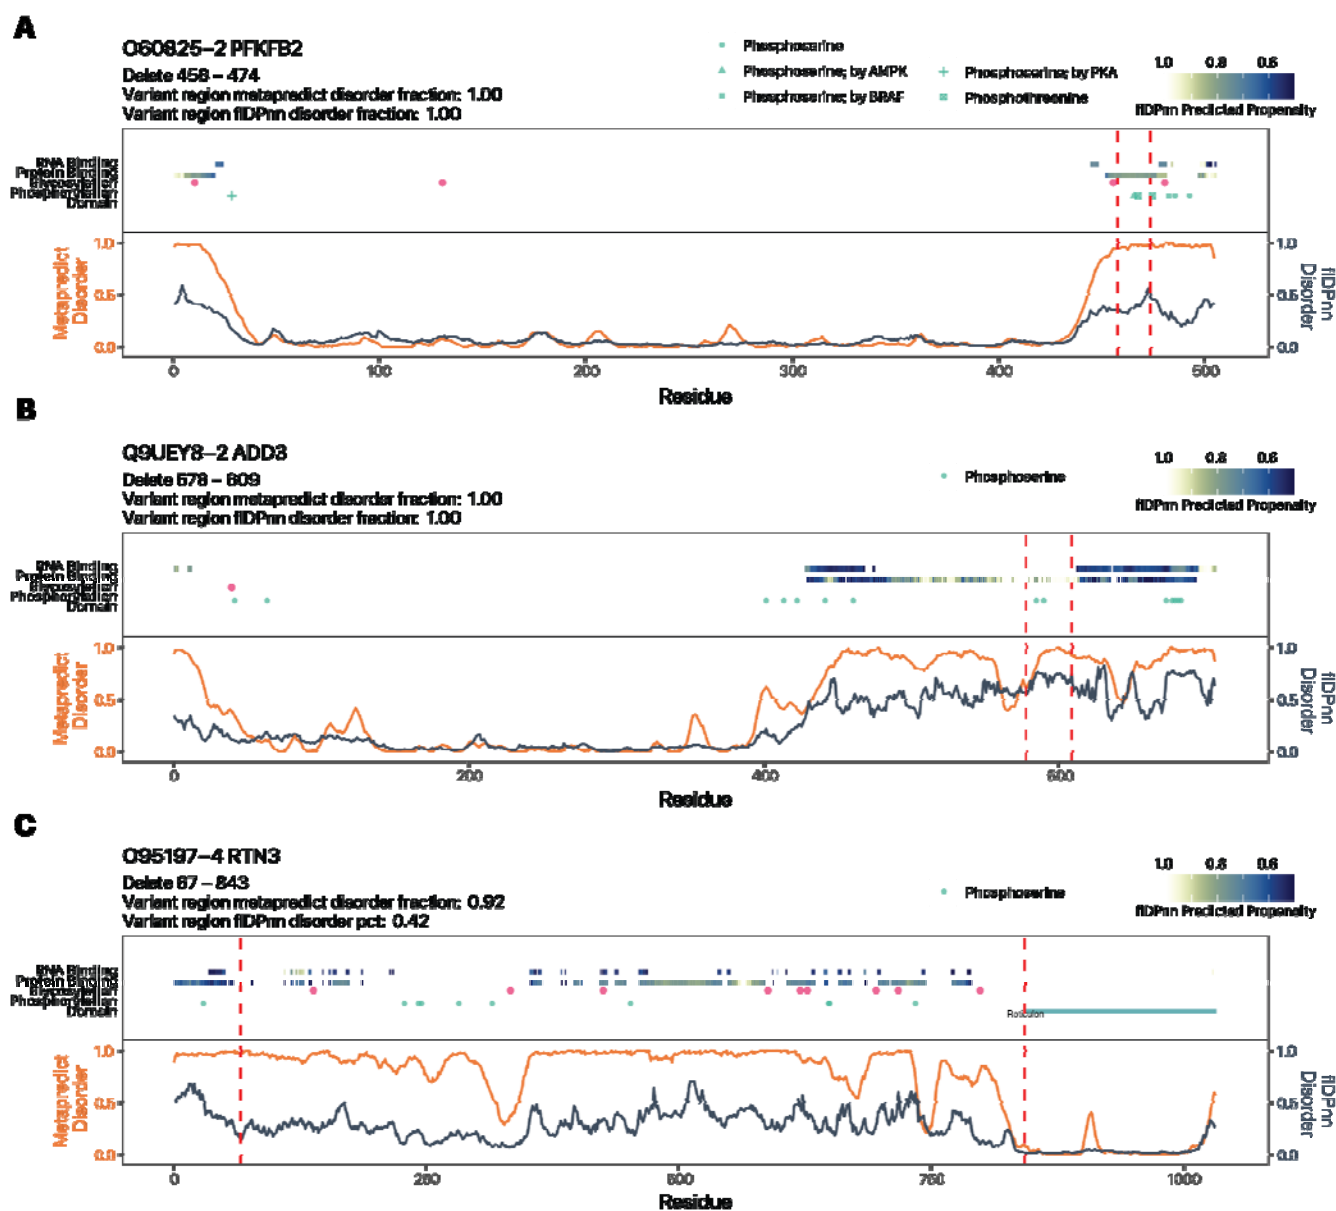

**Supplemental Figure S5:** Alternative isoforms with deleted variant regions from canonical sequences show evidence of IDR remodeling. Three isoforms with variant regions removed from the canonical sequences are shown: **A.** PFKFB2-2; **B.** ADD3-2; **C.** RTN3-4. See legends for Figure 5 for additional details.
